# Supplementary material
Source: PubMed Central journal article supplement (PMC7335737)
Supplement: mmc1.pdf [file mmc1.pdf]

YMTHE, Volume 28

## **Supplemental Information**

### **BEON: A Functional Fluorescence Reporter for Quantification and Enrichment of Adenine Base-Editing Activity**

**Peipei Wang, Li Xu, Yandi Gao, and Renzhi Han**

## Supplementary Information

**Supplementary Table I. Oligos for PCR and construction of gRNAs and reporters**

| Purpose   | Name                              | Sequences (5' → 3')               |
|-----------|-----------------------------------|-----------------------------------|
| gRNAs     | S1gRNA-F                          | ACCGATGACAGGCAGGGGCACCG           |
|           | S1gRNA-R                          | AAACCGGTGCCCCTGCCTGTCAT           |
|           | DYSF_Q605X_gF                     | ACCGATCCTACAGCATGGTGGCTG          |
|           | DYSF_Q605X_gR                     | AAACCAGCCACCATGCTGTAGGAT          |
|           | DYSF_R377X_gF                     | ACCGCCTCACAGGGCTACGCCTGT          |
|           | DYSF_R377X_gR                     | AAACACAGGCGTAGCCCTGTGAGG          |
|           | DYSF_Q1278X_gF                    | ACCGTCTCTAGATGAGCTCAAAG           |
|           | DYSF_Q1278X_gR                    | AAACCTTTTGAGCTCATCTAGAGA          |
|           | CAR-gF                            | ACCGCTTTAATGCGCTGACTTGTG          |
|           | CAR-gR                            | AAACCACAAGTCAGCGCATTAAG           |
|           | mTmem5-gF                         | ACCGACTTACGTTGCTACACCTAA          |
|           | mTmem5-gR                         | AAACTTAGGTGTAGCAACGTAAGT          |
| PCR       | S1-F                              | TTCCAGTGGTTC AATGGTCA             |
|           | S1-R                              | CTTTCAACCCGAACGGAGAC              |
|           | puro-F                            | AGTGGTCTCCGAAACCTCCGCGCCCCGCAAC   |
|           | EGFP_R                            | GTAGGTCAGGGTGGTCACGA              |
|           | CAR-F                             | CCCTCTGTTATGCCACCAGT              |
|           | CAR-R                             | ACTCAGGAGGCTGAAGTGGA              |
|           | mTmem5-F                          | GAAGAGGGCAAATCCAACA               |
|           | mTmem5-R                          | TTGCTTGAAATGAGCACTG               |
|           | Reporters                         | S1-repF                           |
| S1-repR   |                                   | GATCCACTCCGCGGTGCCCCTGCCTGTCATCCG |
| S1NNG-F   |                                   | AATTCGGATGACAGGCAGGGGCACCGAAGTTTG |
| S1NNG-R   |                                   | GATCCAAACTTCGGTGCCCCTGCCTGTCATCCG |
| S1NNG2-F  |                                   | AATTCGGATGACAGGCAGGGGCACCGCAGTTTG |
| S1NNG2-R  |                                   | GATCCAAACTGCGGTGCCCCTGCCTGTCATCCG |
| S1NNG3-F  |                                   | AATTCGGATGACAGGCAGGGGCACCGGAGTTTG |
| S1NNG3-R  |                                   | GATCCAAACTCCGGTGCCCCTGCCTGTCATCCG |
| S1NNG4-F  |                                   | AATTCGGATGACAGGCAGGGGCACCGATGTTTG |
| S1NNG4-R  |                                   | GATCCAAACATCGGTGCCCCTGCCTGTCATCCG |
| S1NNG5-F  |                                   | AATTCGGATGACAGGCAGGGGCACCGCTGTTTG |
| S1NNG5-R  |                                   | GATCCAAACAGCGGTGCCCCTGCCTGTCATCCG |
| S1NNG6-F  |                                   | AATTCGGATGACAGGCAGGGGCACCGGTGTTTG |
| S1NNG6-R  |                                   | GATCCAAACACCGGTGCCCCTGCCTGTCATCCG |
| S1NNG7-F  |                                   | AATTCGGATGACAGGCAGGGGCACCGTTGTTTG |
| S1NNG7-R  |                                   | GATCCAAACAACGGTGCCCCTGCCTGTCATCCG |
| S1NNG8-F  |                                   | AATTCGGATGACAGGCAGGGGCACCGACGTTTG |
| S1NNG8-R  |                                   | GATCCAAACGTCGGTGCCCCTGCCTGTCATCCG |
| S1NNG9-F  |                                   | AATTCGGATGACAGGCAGGGGCACCGCCGTTTG |
| S1NNG9-R  |                                   | GATCCAAACGGCGGTGCCCCTGCCTGTCATCCG |
| S1NNG10-F | AATTCGGATGACAGGCAGGGGCACCGGCGTTTG |                                   |

---

|                  |                                         |
|------------------|-----------------------------------------|
| S1NNG10-R        | GATCCAAACGCCGGTGCCCCCTGCCTGTCATCCG      |
| S1NNG11-F        | AATTCGGATGACAGGCAGGGGCACCGTCGTTTG       |
| S1NNG11-R        | GATCCAAACGACGGTGCCCCCTGCCTGTCATCCG      |
| DYSF_Q605X_repF  | AATTCTACTCAGCCACCATGCTGTAGGATGTGG       |
| DYSF_Q605X_repR  | GATCCCACATCCTACAGCATGGTGGCTGAGTAG       |
| DYSF_R377X_repF  | AATTCGGGCCACAGGCGTAGCCCTGTGAGGAGCCG     |
| DYSF_R377X_repR  | GATCCGGCTCCTCACAGGGCTACGCCTGTGGGCCGG    |
|                  |                                         |
| DYSF_Q1278X_repF | AATTCCTGGCCTCTTTTGAGCTCATCTAGAGAGAGG    |
| DYSF_Q1278X_repR | GATCCCTCTCTCTAGATGAGCTCAAAAGAGGCCAGG    |
| CAR-rep-F        | AATTCCTTTAATGCGCTGACTTGTGTGGGG          |
| CAR-rep-R        | GATCCCCCACACAAGTCAGCGCATTAAAGG          |
| mTmem5-rep-F     | AATTCTGGCCTTTAGGTGTAGCAACGTAAGTACAAG    |
| mTmem5-rep-R     | GATCCTTGTACTIONTACGTTGCTACACCTAAAGGCCAG |

---

**Supplementary Table II. List of plasmids used in this study**

| <b>Purpose</b>            | <b>Name</b>                    | <b>Information</b>                     |
|---------------------------|--------------------------------|----------------------------------------|
| gRNAs                     | pLenti-S1-ogRNA                | S1 optimized gRNA                      |
|                           | pLenti-Q605X-ogRNA             | Q605X optimized gRNA                   |
|                           | pLenti-R377X-ogRNA             | R377X optimized gRNA                   |
|                           | pLenti-Q1278X-ogRNA            | Q1278X optimized gRNA                  |
|                           | pLenti-CAR-ogRNA               | CAR optimized gRNA                     |
|                           | pLenti-mTmem5-ogRNA            | mTmem5 optimized gRNA                  |
| ABEs                      | ABE7.10                        | ABE based on SpCas9                    |
|                           | ABEmax                         | ABE based on codon optimized SpCas9    |
|                           | xABE                           | ABE based on xCas9(3.7)                |
|                           | ScCas9-ABE                     | ABE based on codon optimized ScCas9    |
|                           | ABE-NG                         | ABE based on codon optimized SpCas9-NG |
| Reporters                 | pLKO-puro-E2A-GFP              | Empty reporter                         |
|                           | pLKO-puro-S1-E2A-EGFP          | S1 reporter                            |
|                           | pLKO-puro-Q605X-E2A-EGFP       | Dysferlin Q605X reporter               |
|                           | pLKO-puro-R377X-E2A-EGFP       | Dysferlin R377X reporter               |
|                           | pLKO-puro-Q1278X-E2A-EGFP      | Dysferlin Q1278X reporter              |
|                           | pLKO-puro-S1NNG(1-11)-E2A-EGFP | S1NNG (1-11) reporters                 |
|                           | pLKO-puro-CAR-E2A-EGFP         | CAR reporter                           |
| pLKO-puro-mTmem5-E2A-EGFP | mTmem5 reporter                |                                        |

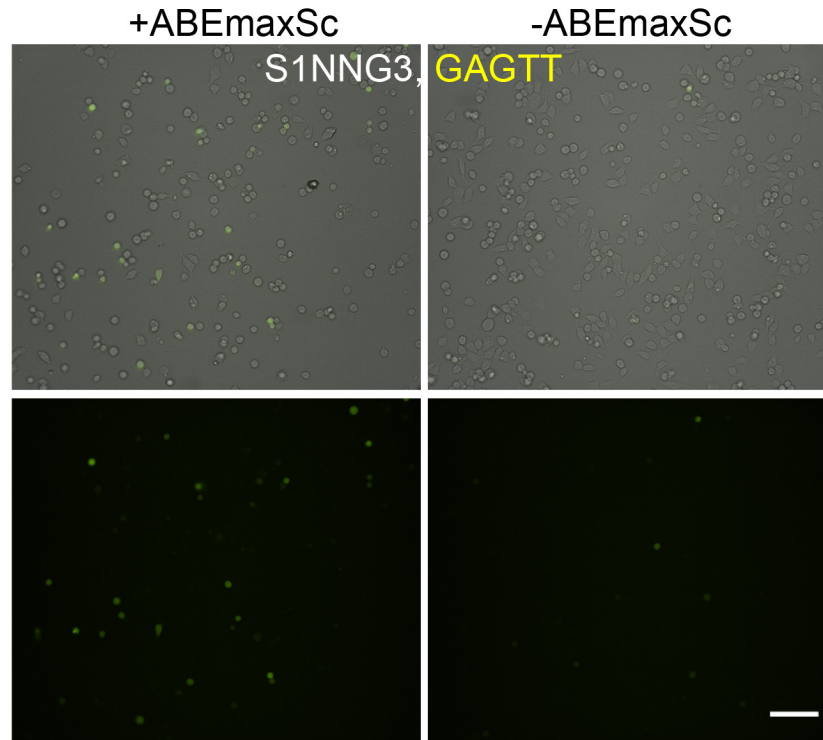

**Supplementary Figure S1.** Representative fluorescence and bright-field (merged) images of HEK293 cells transfected with the S1NNG3 (GAG)-reporter alone, or co-transfected with S1-gRNA, ScCas9-ABE and S1NNG3 reporter. The PAM sequences are listed in yellow. Scale bar: 100  $\mu$ m.

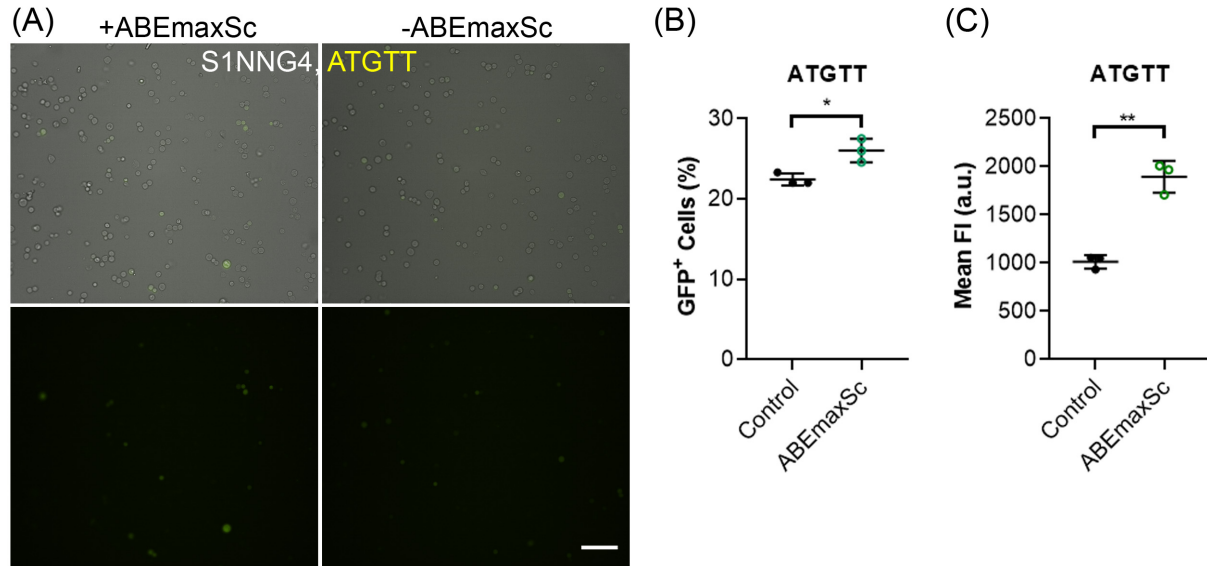

**Supplementary Figure S2.** (A) Representative fluorescence and bright-field (merged) images of HEK293 cells transfected with the S1NNG4 (ATG)-reporter alone, or co-transfected with S1-gRNA, ScCas9-ABE and S1NNG4 reporter. The PAM sequences are listed in yellow. Scale bar: 100  $\mu$ m. (B) FACS quantification of GFP<sup>+</sup> cells for S1NNG4 reporter with or without ScCas9-ABE editing. \* $p$ <0.05. (C) FACS quantification of the geometric mean of GFP fluorescence intensity in GFP<sup>+</sup> cells (out of a total  $1 \times 10^5$  cells) for S1NNG4 reporter with or without ScCas9-ABE editing. \*\* $p$ <0.01.

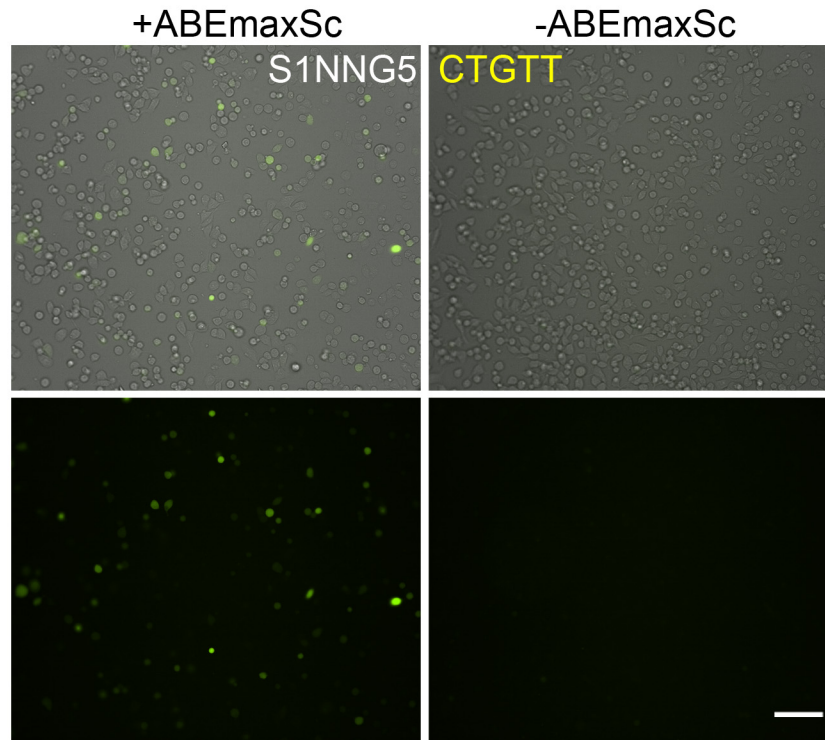

**Supplementary Figure S3.** Representative fluorescence and bright-field (merged) images of HEK293 cells transfected with the S1NNG5 (CTG)-reporter alone, or co-transfected with S1-gRNA, ScCas9-ABE and S1NNG5 reporter. The PAM sequences are listed in yellow. Scale bar: 100  $\mu$ m.

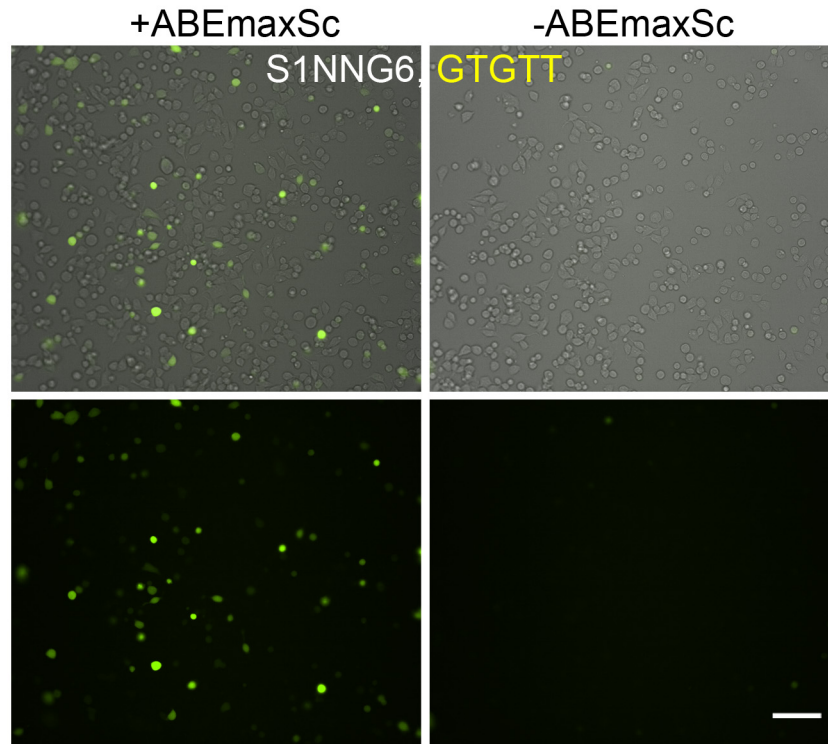

**Supplementary Figure S4.** Representative fluorescence and bright-field (merged) images of HEK293 cells transfected with the S1NNG6 (GTG)-reporter alone, or co-transfected with S1-gRNA, ScCas9-ABE and S1NNG6 reporter. The PAM sequences are listed in yellow. Scale bar: 100  $\mu$ m.



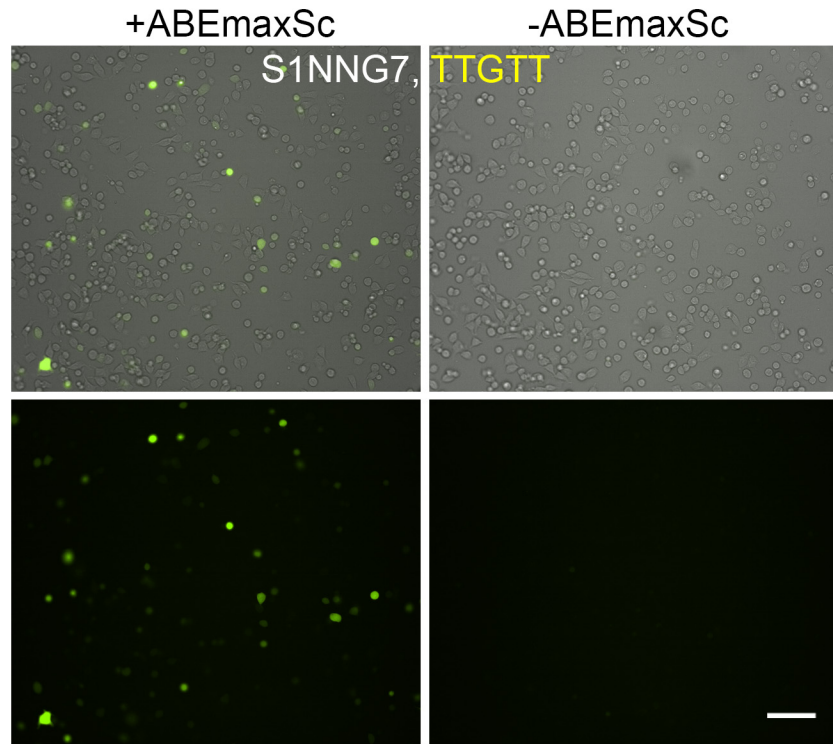

**Supplementary Figure S5.** Representative fluorescence and bright-field (merged) images of HEK293 cells transfected with the S1NNG7 (TTG)-reporter alone, or co-transfected with S1-gRNA, ScCas9-ABE and S1NNG7 reporter. The PAM sequences are listed in yellow. Scale bar: 100  $\mu$ m.

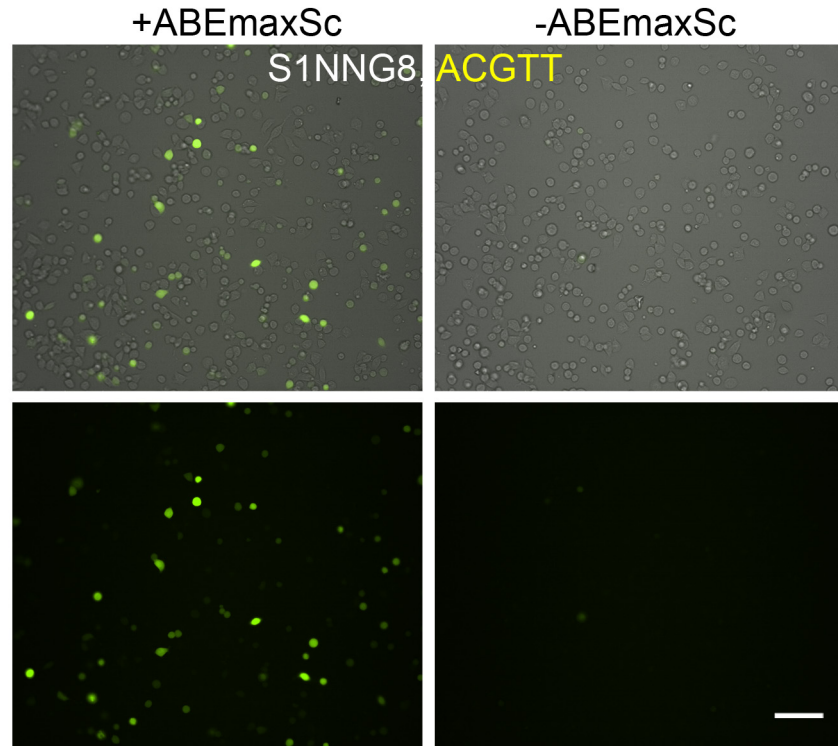

**Supplementary Figure S6.** Representative fluorescence and bright-field (merged) images of HEK293 cells transfected with the S1NNG8 (ACG)-reporter alone, or co-transfected with S1-gRNA, ScCas9-ABE and S1NNG8 reporter. The PAM sequences are listed in yellow. Scale bar: 100  $\mu$ m.

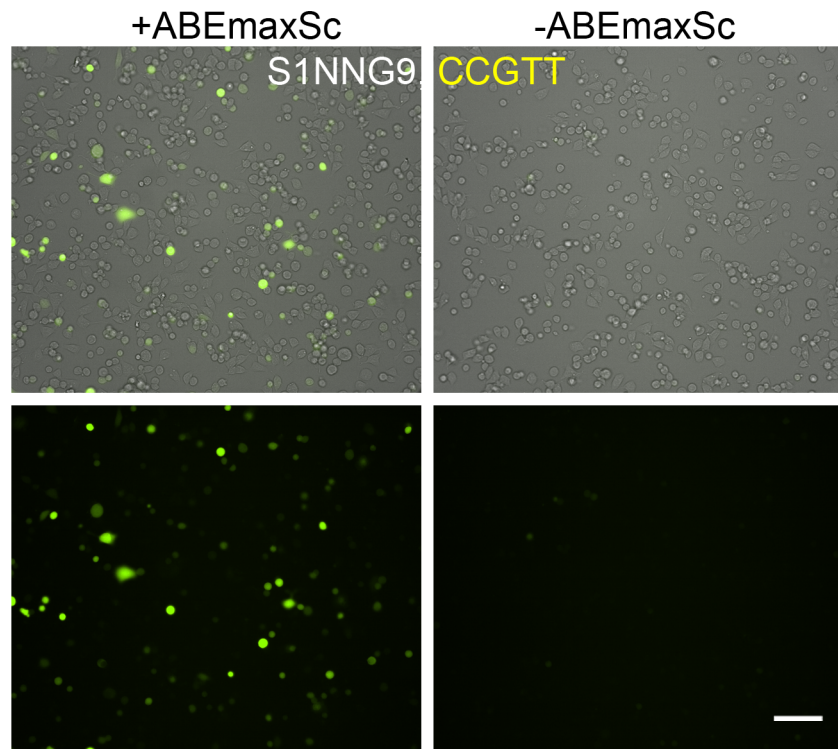

**Supplementary Figure S7.** Representative fluorescence and bright-field (merged) images of HEK293 cells transfected with the S1NNG9 (CCG)-reporter alone, or co-transfected with S1-gRNA, ScCas9-ABE and S1NNG9 reporter. The PAM sequences are listed in yellow. Scale bar: 100  $\mu$ m.

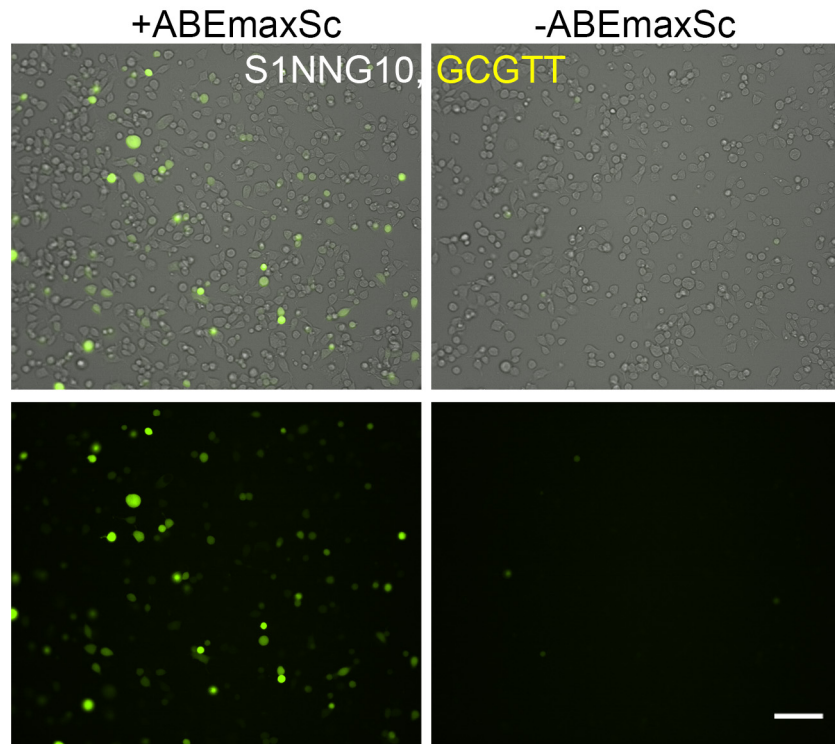

**Supplementary Figure S8.** Representative fluorescence and bright-field (merged) images of HEK293 cells transfected with the S1NNG10 (GCG)-reporter alone, or co-transfected with S1-gRNA, ScCas9-ABE and S1NNG10 reporter. The PAM sequences are listed in yellow. Scale bar: 100  $\mu$ m.

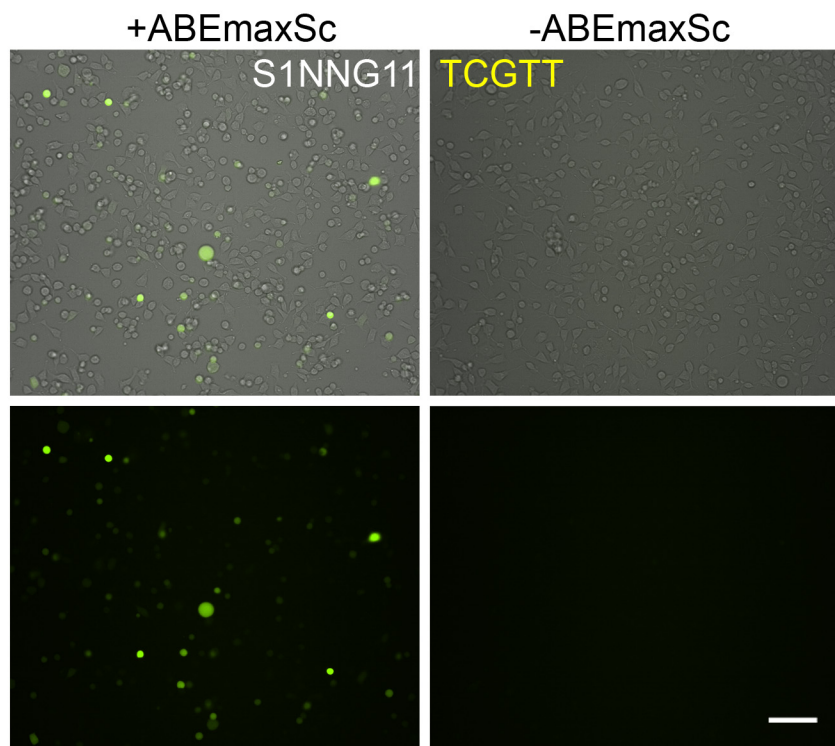

**Supplementary Figure S9.** Representative fluorescence and bright-field (merged) images of HEK293 cells transfected with the S1NNG11 (TCG)-reporter alone, or co-transfected with S1-gRNA, ScCas9-ABE and S1NNG11 reporter. The PAM sequences are listed in yellow. Scale bar: 100  $\mu$ m.
